# Supplementary material for: Advancing catalytic oxidation of lean methane over cobalt-manganese oxide via a phase-engineered amorphous/crystalline interface
Source: Royal Society of Chemistry journal article supplement (doi:10.1039/d4cc02696a), 2024-01-01
Supplement: d4cc02696a1.pdf [file d4cc02696a1.pdf]

## Supplementary Information

### Advancing catalytic oxidation of lean methane over cobalt- manganese oxide via phase-engineered amorphous/crystalline interface

Wei Wang<sup>a,b,†</sup>, Ruishan Qiu<sup>a,b,†</sup>, Chenqi Li<sup>a,b</sup>, Ruixia Zhong<sup>a</sup>, Haiwang Wang<sup>\*a</sup>, Jian Qi<sup>\*c,d</sup>

<sup>a</sup>Key Laboratory of Dielectric and Electrolyte Functional Material Hebei Province, Northeastern University at Qinhuangdao, Qinhuangdao 066004, P. R. China

<sup>b</sup>School of Materials Science and Engineering, Northeastern University, Shenyang, Liaoning 110819, P. R. China

<sup>c</sup>State Key Laboratory of Biochemical Engineering, Institute of Process Engineering, Chinese Academy of Sciences, Beijing 100190, P. R. China

<sup>d</sup>School of Chemical Engineering, University of Chinese Academy of Sciences, Beijing 100049, P. R. China

<sup>†</sup>These authors contributed equally to this work.

\*Corresponding authors:

Email: whwdbdx@126.com (H. Wang); jqj@ipe.ac.cn (J. Qi)

### Experimental section

All chemicals (analytical grade) were used directly without further purification in the synthesis process. The preparation process refers to the literature<sup>1</sup>. Co(NO<sub>3</sub>)<sub>2</sub>·6H<sub>2</sub>O (5 mmol), Mn(CH<sub>3</sub>COO)<sub>2</sub>·4H<sub>2</sub>O (1 mmol), and Polyethylene glycol-2000 (PEG-2000) (0.1875 mmol) were dissolved in 20 mL of deionized water to prepare the precursor solution A. NH<sub>4</sub>HCO<sub>3</sub> (6 mmol) was prepared in 10 mL of deionized water as the precipitant to form the solution B, which was transferred to a flat bottom flask. NH<sub>4</sub>HCO<sub>3</sub> (6 mmol) was prepared in 10 ml of deionized water as a precipitant to form solution B, which was then transferred to a flat-bottom flask. Solution A was then added to solution B and reacted in an ultraviolet ultrasonic microwave three-in-one reaction instrument, (MC8S-3, Nanjing, China) for 30 minutes. The suspension was then washed three times with anhydrous ethanol and the precipitate was dried at 70 °C for 6 h and then calcined at 350 °C for 4 h. The ultrasonic power was fixed at 300 W. The precipitate was then dried at 70 °C for 6 h

and calcined at 350 °C for 4 h. To explore the optimal microwave power, the ultrasonic power was fixed at 300 W. The CoMnO<sub>x</sub> samples were referred to as MW-X US-300W (MW is the microwave power and X is the power in watts. The X = 50W, 100W, 150W, 200W, 250W, 300W and 400W)

After determining the optimal power of 250 W, the microwave power was fixed at 250 W and the ultrasonic power was adjusted to obtain a sample called MW-250 W US-Y (US is the ultrasonic power, Y = 90 W, 180 W, 300 W, 450 W and 540 W)

### **Catalyst characterizations**

The XRD patterns were determined by an X-ray diffractometer (Rigaku Smartlab, Japan). The thermogravimetric (TG) analysis and differential scanning calorimetry (DSC) was conducted on a Setsys Evolution thermal analyzer (Simultaneous, France). SEM analysis was performed on a Supra 55 scanning electron microscope (Germany). TEM and HRTEM were conducted by Tecnai G2 TF20 high-resolution transmission electron microscope (Philips-FEI) to observe the micromorphology and crystal structure of the catalysts. The Brunauer-Emmett-Teller (BET) surface area was measured on an SSA-4000 pore specific surface area analyzer. Fourier transform infrared (FTIR) spectra were carried out using an FTIR-8400S spectrometer (Shimadzu, Japan). XPS was measured on the Escalab 250 X-ray photoelectron spectrometer (Thermo VG, USA). Hydrogen temperature programmed reduction analysis (H<sub>2</sub>-TPR) was performed on a BELCAT instrument (BEL Japan, Inc.). In situ DRIFTS was carried out on Bruker equipment (Germany).

### **Catalytic activity test**

The catalytic activities of catalysts for methane combustion were carried out in a quartz reaction tube (diameter = 6 mm, length = 550 mm) which was used as a quartz micro-fixed bed reactor at atmospheric pressure. The middle of the quartz tube is fixed by a sand core. For each measurement, 100 mg of the catalysts were loaded into the center of the quartz micro-fixed bed reactor. A gas mixture composed of 1 vol.% CH<sub>4</sub>, 20 vol.% O<sub>2</sub>, 5 vol.% or 10 vol.% H<sub>2</sub>O (when used) and balanced N<sub>2</sub> was fed

into the micro-reactor, and the total flow rate was held at 60 mL min<sup>-1</sup> via a mass flow controller, corresponding to the space velocity (GHSV) of 36,000 mL g<sup>-1</sup> h<sup>-1</sup>. The gas composition of the inlet and outlet of the reaction tube was analyzed on-line by a gas chromatograph (GC-7890) equipped with TCD and a flame ionization detector (FID) detector.

The methane gas conversion was calculated by the following equation:

$$\text{CH}_4 \text{ conversion}(\%) = \frac{[\text{CH}_4]_{in} - [\text{CH}_4]_{out}}{[\text{CH}_4]_{in}} \times 100(\%)$$

Where CH<sub>4</sub> conversion (%) represents the conversion of methane, [CH<sub>4</sub>]<sub>in</sub> represents the initial concentration of methane, and [CH<sub>4</sub>]<sub>out</sub> represents the concentration of methane after catalytic combustion.

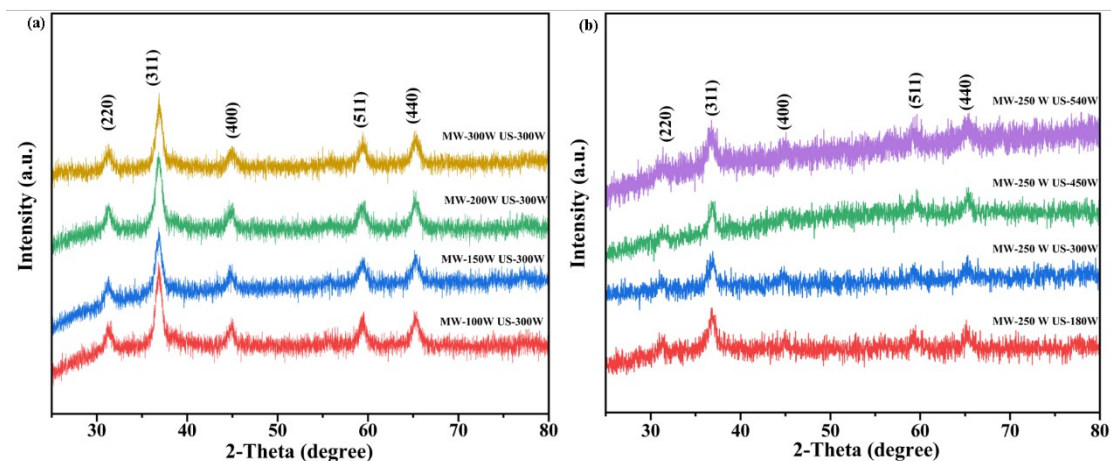

Fig. S1 (a) XRD patterns of different sample.

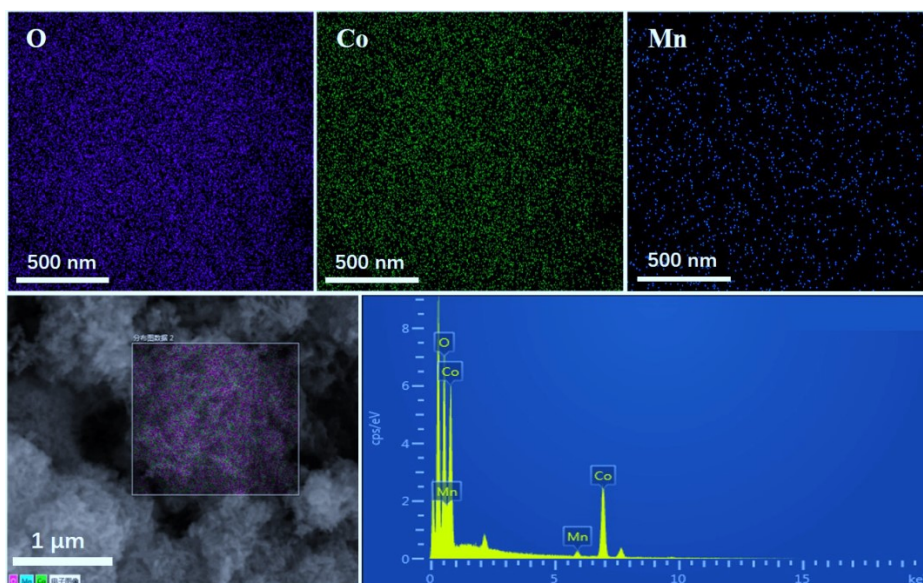

Fig. S2 SEM-EDS of the typical MW-250 W US-300 W catalyst.

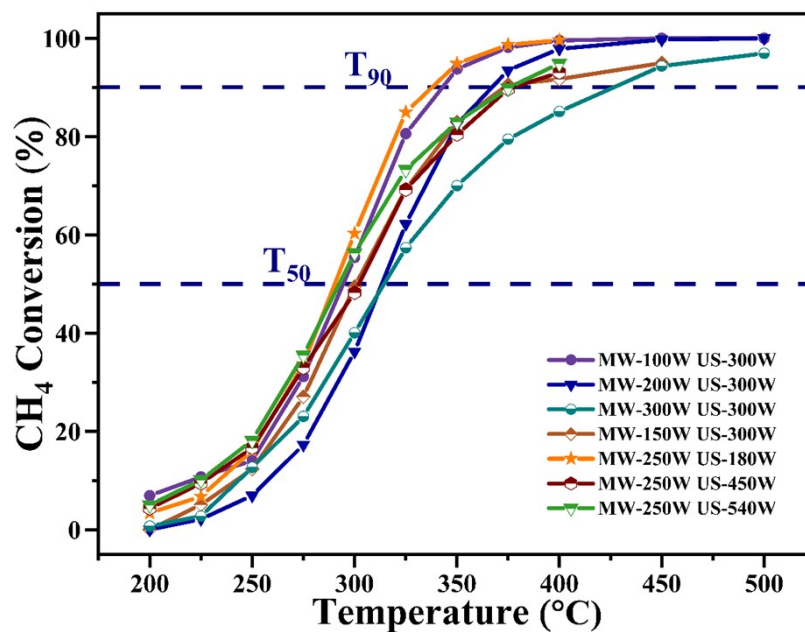

Fig. S3 CH<sub>4</sub> oxidation activity for different samples as a function of temperature.

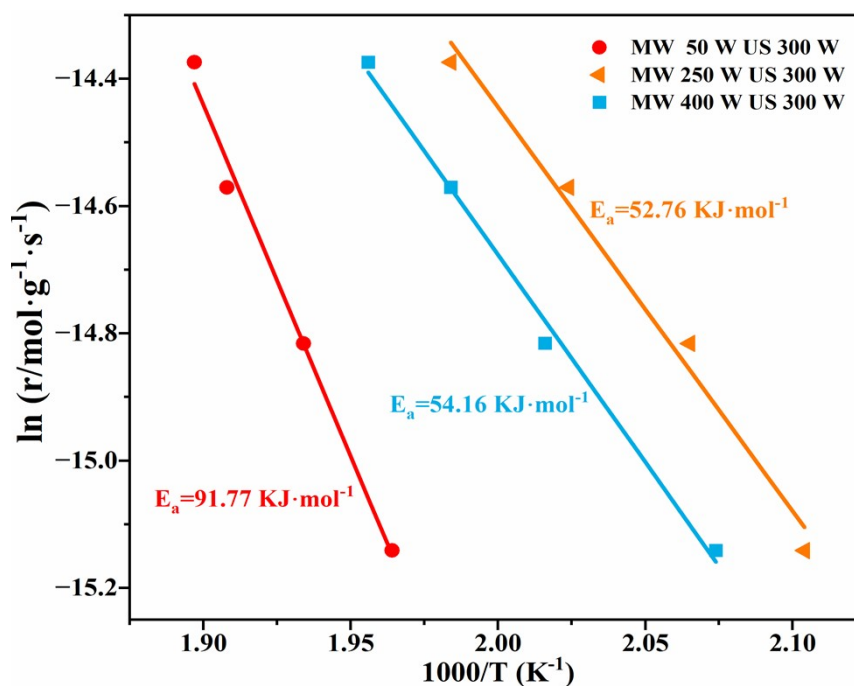

Fig. S4 Arrhenius plots for methane oxidation over different samples.

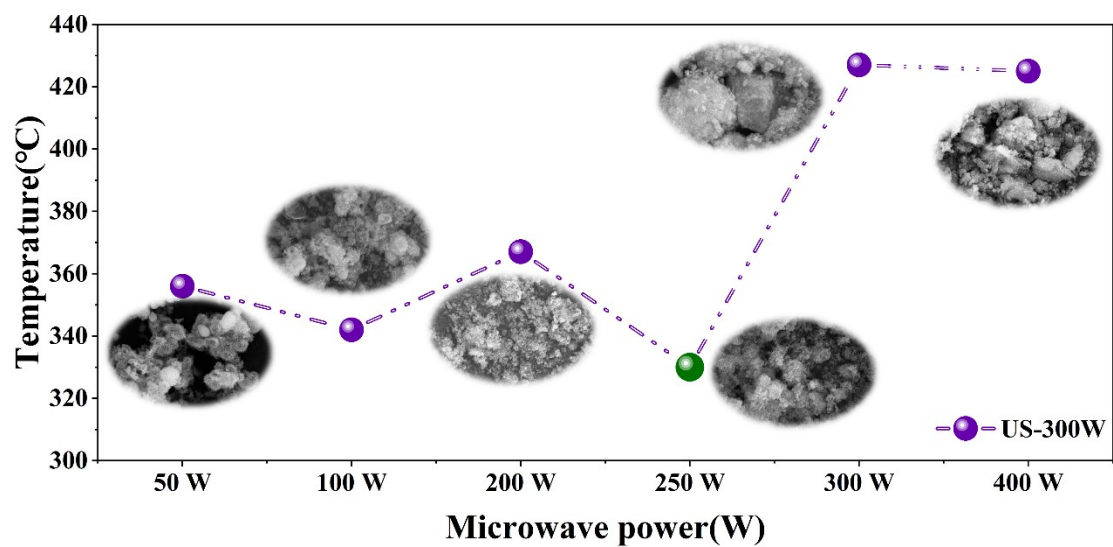

Fig. S5 The relationship between microwave, morphology, and performance of catalysts.

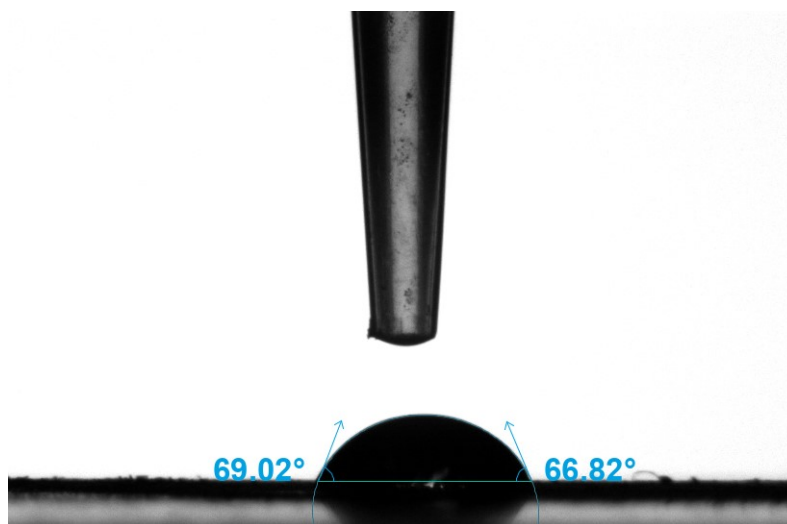

Fig. S6 Static water droplets contact angles of MW-250W US-300W catalyst

**Table S1** BET surface areas, pore sizes, pore volumes for the different samples

| Sample          | $S_{\text{BET}}$ ( $\text{m}^2/\text{g}$ ) | $V_{\text{tot}}$ ( $\text{cm}^3/\text{g}$ ) | Average pore size (nm) |
|-----------------|--------------------------------------------|---------------------------------------------|------------------------|
| MW-50W US-300W  | 94.95                                      | 0.54                                        | 22.56                  |
| MW-250W US-300W | 87.69                                      | 0.84                                        | 38.02                  |
| MW-400W US-300W | 96.43                                      | 0.50                                        | 19.86                  |
| MW-400W US-90W  | 91.21                                      | 0.57                                        | 25.12                  |

**Table S2** Comparison of the catalytic activities of various reported catalysts with those in present work

| Catalysts                                                  | Reaction Conditions                                                                                   | $T_{50}/^\circ\text{C}$ | $T_{90}/^\circ\text{C}$ | Ref.      |
|------------------------------------------------------------|-------------------------------------------------------------------------------------------------------|-------------------------|-------------------------|-----------|
| MB- $\text{Co}_3\text{O}_4$                                | 1% $\text{CH}_4$ , 20% $\text{O}_2$ , 30,000 $\text{mL}\cdot\text{g}^{-1}\cdot\text{h}^{-1}$          | 355                     | 434                     | 2         |
| $\text{NiCo}_2\text{O}_4$ bubbles                          | 1 % $\text{CH}_4$ , 20% $\text{O}_2$ , 30,000 $\text{mL}\cdot\text{h}^{-1}\cdot\text{g}^{-1}$         | 346                     | 401                     | 2         |
| 60% $\text{MnCo}_2\text{O}_4/\text{SiC}$                   | 1% $\text{CH}_4$ , 20% $\text{O}_2$ , SV = 45000 $\cdot\text{mL}/(\text{g}\cdot\text{h})$             | 375                     | 444                     | 3         |
| $\text{Co}_3\text{O}_4\text{-ZrO}_2(2\%)$                  | 0.5% $\text{CH}_4$ , 8.0% $\text{O}_2$ , 40 $\text{mL}\cdot\text{min}^{-1}$                           | —                       | 335                     | 4         |
| Co-In-0.2                                                  | 1% $\text{CH}_4$ , 10% $\text{O}_2$ , 48,000 $\text{mL}\cdot\text{g}^{-1}\cdot\text{h}^{-1}$          | —                       | 380                     | 5         |
| N- $\text{Co}_3\text{O}_4$ -110                            | 2vol.% $\text{CH}_4$ , 20 vol.% $\text{O}_2$ , 46,800 $\text{mL}\cdot\text{g}^{-1}\cdot\text{h}^{-1}$ | 342                     | 412                     | 6         |
| CoGO50                                                     | 1vol% $\text{CH}_4$ , 10 vol% $\text{O}_2$ , 30,000 $\text{mL}\cdot\text{g}^{-1}\cdot\text{h}^{-1}$   | 295                     | 370                     | 7         |
| $\text{Pd}(\text{PdO})/\text{Co}_3\text{O}_4@\text{SiO}_2$ | 1% $\text{CH}_4$ , 21% $\text{O}_2$ , 30,000 $\text{mL}\cdot\text{g}^{-1}\cdot\text{h}^{-1}$          | 357                     | 445                     | 8         |
| $\text{Pd-Co}_3\text{O}_4$                                 | 1% $\text{CH}_4$ , 20% $\text{O}_2$ , 30,000 $\text{mL}\cdot\text{g}^{-1}\cdot\text{h}^{-1}$          | 291                     | 337                     | 9         |
| $\text{CoMnO}_x$ , MW-250W                                 | 1% $\text{CH}_4$ , 20% $\text{O}_2$ , 36,000 $\text{mL}\cdot\text{g}^{-1}\cdot\text{h}^{-1}$          | 281                     | 330                     | This work |

**Notes and references**

1. X. Fan, L. Li, X. Yang, Z. Guo, F. Jing and W. Chu, *Catalysis Today*, 2020, **347**, 23-30.
2. W. Wen, J. Che, J. Wu, H. Kobayashi, Y. Pan, W. Wen, Y.-H. Dai, W. Huang, C. Fu, Q. Zhou, G.-L. Lu, H. Tian, J. Liu, P. Yang, X. Chen, T.-L. Sun and J. Fan, *ACS Catalysis*, 2022, **12**, 7037-7045.
3. Y. Zhao, Z. Gu, D. Li, J. Yuan, L. Jiang, H. Xu, C. Lu, G. Deng, M. Li, W. Xiao and K. Li, *Fuel*, 2022, **323**, 124399.
4. Z. Pu, Y. Liu, H. Zhou, W. Huang, Y. Zheng and X. Li, *Applied Surface Science*, 2017, **422**, 85-93.
5. Y. Zheng, C. Wang, J. Li, F. Zhong, Y. Xiao and L. Jiang, *ACS Applied Nano Materials*, 2020, **3**, 9470-9479.
6. Q. Yu, C. Liu, X. Li, C. Wang, X. Wang, H. Cao, M. Zhao, G. Wu, W. Su, T. Ma, J. Zhang, H. Bao, J. Wang, B. Ding, M. He, Y. Yamauchi and X. S. Zhao, *Applied Catalysis B: Environmental*, 2020, **269**, 118757.
7. D. Gong and G. Zeng, *Scientific Reports*, 2021, **11**, 12604.
8. Y. Ma, S. Li, T. Zhang, Y. Zhang, X. Wang, Y. Xiao, Y. Zhan and L. Jiang, *Nanoscale*, 2021, **13**, 5026-5032.
9. J. Xiong, K. Wu, J. Yang, P. Liu, L. Song, J. Zhang, M. Fu, L. Chen, H. Huang, J. Wu and D. Ye, *Applied Surface Science*, 2021, **539**, 148211.
